# Supplementary material
Source: PubMed Central journal article supplement (PMC8095456)
Supplement: JB.00604-20-s0003.pdf [file JB.00604-20-s0003.pdf]

**Supplementary Material**

**The conserved translation factor LepA is required for optimal synthesis of a porin family in *Mycobacterium smegmatis***

Skye R.S. Fishbein<sup>1</sup>, Francesca G. Tomasi<sup>1</sup>, Ian D. Wolf<sup>1</sup>, Charles L. Dulberger<sup>1</sup>, Albert Wang<sup>1</sup>, Hasmik Keshishian<sup>2</sup>, Luke Wallace<sup>2</sup>, Steven A. Carr<sup>2</sup>, Thomas R. Ioerger<sup>3</sup>, E. Hesper Rego<sup>4</sup>, Eric J. Rubin<sup>1\*</sup>

<sup>1</sup>Department of Immunology and Infectious Disease, Harvard TH Chan School of Public Health, Boston, Massachusetts, 02115, United States

<sup>2</sup>Broad Institute of MIT and Harvard, Cambridge, 02142, United States

<sup>3</sup>Department of Computer Science and Engineering, Texas A&M University, Texas, 77843, United States

<sup>4</sup>Department of Microbial Pathogenesis, Yale University School of Medicine, New Haven, Connecticut, 06510, United States

\*Correspondence: erubin@hsph.harvard.edu

**This PDF contains:**

Figure S1 to S3

Table S1 to S5

**Other supplementary material for this manuscript includes:**

Dataset S1 to S2

## Supplementary Figures

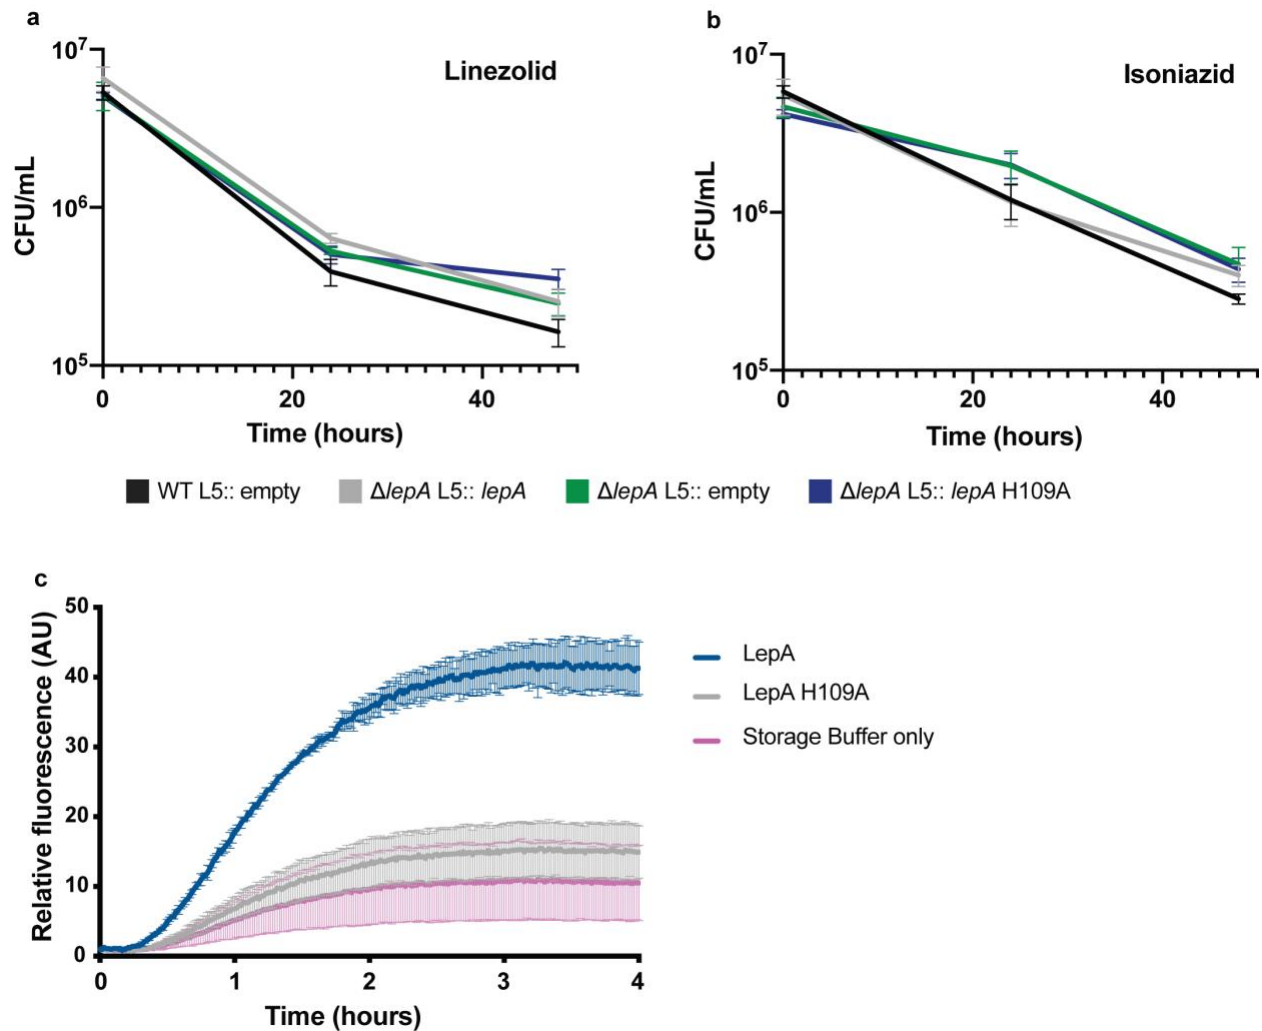

**Figure S1.** a-b) Msm strains were treated with 10X concentrations of linezolid and isoniazid, and cell survival was measured by colony forming units per mL (CFU/mL) as in Figure 1. Values indicate mean survival with error bars indicating standard deviation of three biological replicates. c) *In vitro* translation was carried out using Venus mRNA with LepA, LepA H109A or storage buffer alone. Curves represent mean relative fluorescence (normalized by fluorescence at t=0) with error bars indicating the range across two technical replicates. Data in a-c) are representative of multiple experiments.

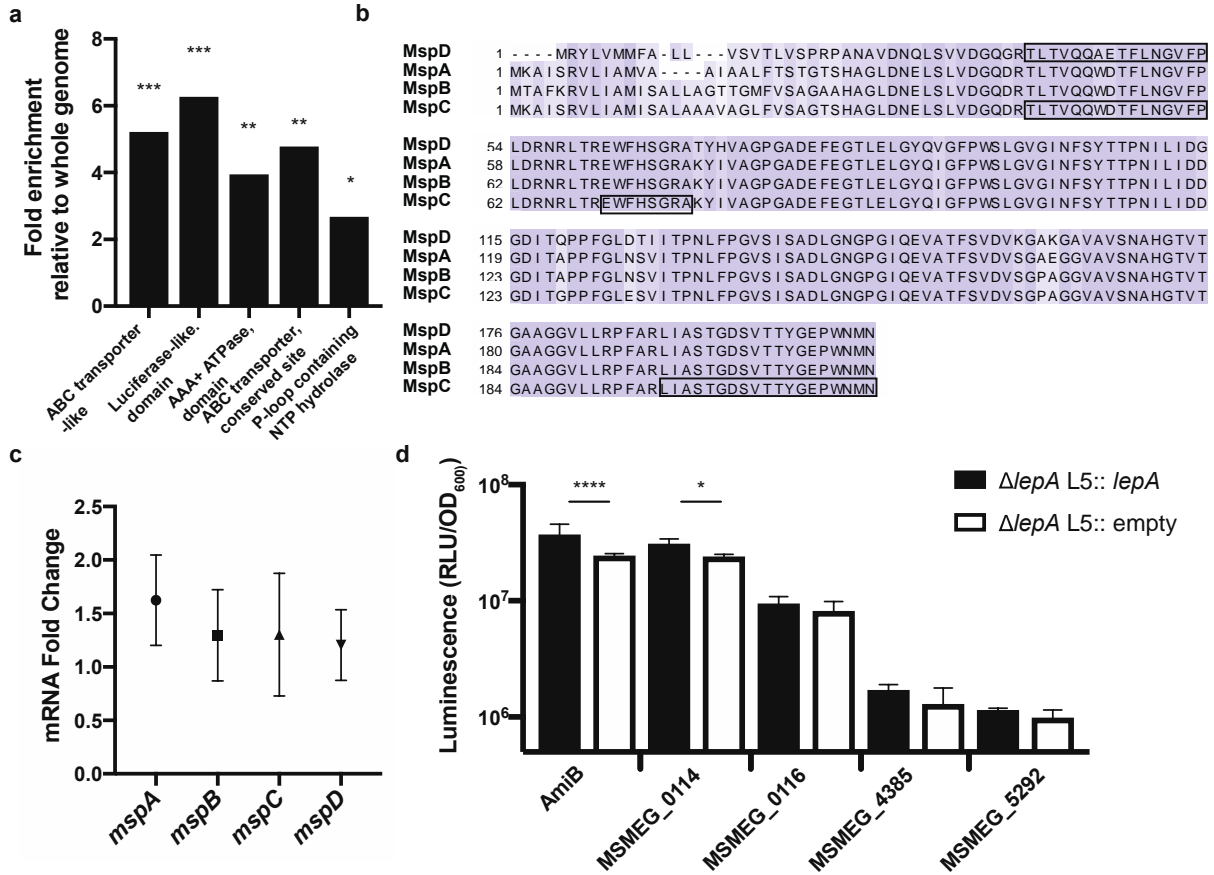

**Figure S2.** a) Fold-change in enrichment of InterPro functional annotation(1) terms in proteins altered by loss of LepA relative to the total Msm proteome. \*\*\*  $P < 0.001$ , \*\*  $P < 0.001$ , \*  $P < 0.05$ , calculated using a modified Fisher's exact test. b) A Clustal Omega alignment of mycobacterial porin family proteins in Msm. Black boxes indicate the 4 unique peptides that mapped to a mycobacterial porin in our proteomics data. Decreasing hue corresponds to decreasing percent identity across the four sequences. c) Changes in porin transcript levels due to LepA, as measured by RT-qPCR. Relative fold change of each mRNA was quantified by normalizing levels of each porin transcript to levels of *sigA* transcript. Points represent the mean of three biological replicates, with error bars depicting standard deviation. Fold changes were not significantly different from 1, as examined by a one-sided Student's t-test. d) Luminescence of candidate reporter fusions in  $\Delta lepA$  deletion mutant and the complemented strain. \*\*\*  $P < 0.001$ , \*  $P < 0.05$ , computed using a Student's t-test. Data in c-d) are representative of multiple experiments.

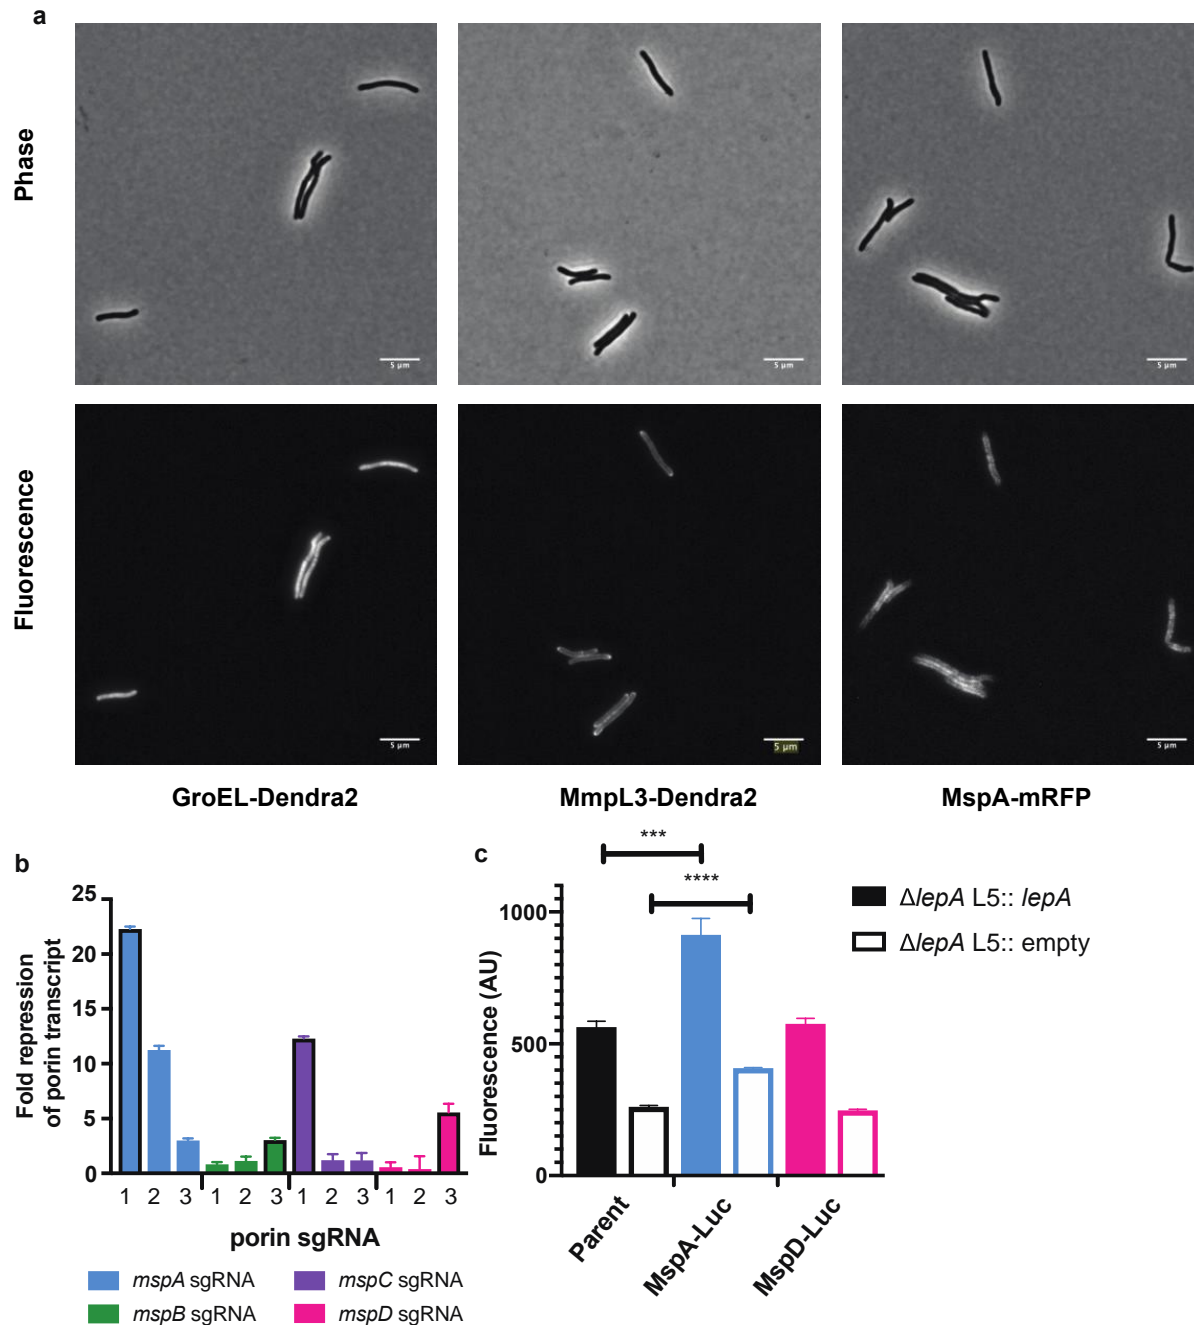

**Figure S3.** a) Localization of MspA-mRFP in Msm. Scale bar represents 5 microns and applies to all images. Visualization of phase-contrast and fluorescence in GroEL-Dendra2 (left), MmpL3-Dendra2 (middle) and MspA-mRFP expressing strains (right). b) Three sgRNAs with different PAM strengths (2) were chosen to achieve maximal knockdown of each porin. Black lines around a bar indicate selection of that sgRNA for future experiments. Fold repression, quantified using RT-qPCR, indicates the difference in knockdown between induced and uninduced strains. c) Calcein staining of luciferase-porin reporter strains was used to assess porin coding sequence contribution to permeability. 'Parent' indicates the complemented strain (filled bar) and  $\Delta lepA$  (open bar), with no merodiploid porin reporter. Each subsequent set of bars indicates derivatives of those two parental strains containing the specified porin reporter used in Figure 2. Bars indicate mean fluorescence with error bars indicating standard deviation

around three replicates. \*\*\*\* $P < 0.0001$ , \*\*\* $P < 0.001$  calculated using a one-sided ANOVA, where complemented strains were compared against one another and  $\Delta/epA$  strains were compared against one another. Data in a-c) are representative of multiple experiments.

**Supplementary Tables**

**Table S1: Minimum inhibitory concentration (MIC) of *lepA* mutant**

| <b>Drug †</b>          | <b>Complemented strain</b> | <b>Deletion mutant</b> |
|------------------------|----------------------------|------------------------|
| <b>Tetracycline</b>    | 0.250                      | 0.250                  |
| <b>Clarithromycin</b>  | 0.125                      | 0.125                  |
| <b>Chloramphenicol</b> | 10                         | 10                     |
| <b>Amikacin</b>        | 0.200                      | 0.200                  |
| <b>Erythromycin</b>    | 0.500                      | 0.500                  |

†Values are averages of three replicates, in µg/ml concentrations of drug.

**Table S2: Strain List**

| Strain Number | Parental Background (Strain number)   | Plasmid at L5 Integration Site (Plasmid #)                                | Plasmid at Tweety Integration Site (Plasmid #)               |
|---------------|---------------------------------------|---------------------------------------------------------------------------|--------------------------------------------------------------|
| HR334         | $\Delta lepA::ZeoR$                   | None                                                                      | None                                                         |
| SF177         | mc <sup>2</sup> 155                   | p-empty-KanR(CT242)                                                       | None                                                         |
| SF178         | $\Delta lepA::ZeoR$ (HR334)           | pP <sub>natp</sub> - <i>lepA</i> -KanR(121)                               | None                                                         |
| SF181         | $\Delta lepA::ZeoR$ (HR334)           | p-empty-KanR(CT242)                                                       | None                                                         |
| SF290         | $\Delta lepA::ZeoR$ (HR334)           | pP <sub>natp</sub> - <i>lepA</i> -KanR(121)                               | pP <sub>UV15</sub> - <i>mspA</i> -Nluc-NatR(283)             |
| SF291         | $\Delta lepA::ZeoR$ (HR334)           | p-empty-KanR(CT242)                                                       | pP <sub>UV15</sub> - <i>mspA</i> -Nluc-NatR(283)             |
| SF302         | $\Delta lepA::ZeoR$ (HR334)           | pP <sub>natp</sub> - <i>lepA</i> -KanR(121)                               | pP <sub>UV15</sub> -Nluc-NatR(287)                           |
| SF303         | $\Delta lepA::ZeoR$ (HR334)           | p-empty-KanR(CT242)                                                       | pP <sub>UV15</sub> -Nluc-NatR(287)                           |
| SF432         | $\Delta lepA::ZeoR$ (HR334)           | None                                                                      | pP <sub>natp</sub> - <i>lepA</i> -HygR(417)                  |
| SF433         | $\Delta lepA::ZeoR$ (HR334)           | None                                                                      | p-empty-HygR(418)                                            |
| SF434         | $\Delta lepA::ZeoR$ (HR334)           | pP <sub>UV15-Tet</sub> - <i>dCas9</i> -sgRNA1 ( <i>mspA1</i> )-KanR(419)  | pP <sub>natp</sub> - <i>lepA</i> -HygR(417)                  |
| SF435         | $\Delta lepA::ZeoR$ (HR334)           | pP <sub>UV15-Tet</sub> - <i>dCas9</i> -sgRNA2 ( <i>mspA2</i> )-KanR(420)  | pP <sub>natp</sub> - <i>lepA</i> -HygR(417)                  |
| SF436         | $\Delta lepA::ZeoR$ (HR334)           | pP <sub>UV15-Tet</sub> - <i>dCas9</i> -sgRNA3 ( <i>mspA3</i> )-KanR(421)  | pP <sub>natp</sub> - <i>lepA</i> -HygR(417)                  |
| SF437         | $\Delta lepA::ZeoR$ (HR334)           | pP <sub>UV15-Tet</sub> - <i>dCas9</i> -sgRNA4 ( <i>mspB1</i> )-KanR(422)  | pP <sub>natp</sub> - <i>lepA</i> -HygR(417)                  |
| SF438         | $\Delta lepA::ZeoR$ (HR334)           | pP <sub>UV15-Tet</sub> - <i>dCas9</i> -sgRNA5 ( <i>mspB2</i> )-KanR(423)  | pP <sub>natp</sub> - <i>lepA</i> -HygR(417)                  |
| SF439         | $\Delta lepA::ZeoR$ (HR334)           | pP <sub>UV15-Tet</sub> - <i>dCas9</i> -sgRNA6 ( <i>mspB3</i> )-KanR(424)  | pP <sub>natp</sub> - <i>lepA</i> -HygR(417)                  |
| SF440         | $\Delta lepA::ZeoR$ (HR334)           | pP <sub>UV15-Tet</sub> - <i>dCas9</i> -sgRNA7 ( <i>mspC1</i> )-KanR(425)  | pP <sub>natp</sub> - <i>lepA</i> -HygR(417)                  |
| SF441         | $\Delta lepA::ZeoR$ (HR334)           | pP <sub>UV15-Tet</sub> - <i>dCas9</i> -sgRNA8 ( <i>mspC2</i> )-KanR(426)  | pP <sub>natp</sub> - <i>lepA</i> -HygR(417)                  |
| SF442         | $\Delta lepA::ZeoR$ (HR334)           | pP <sub>UV15-Tet</sub> - <i>dCas9</i> -sgRNA9 ( <i>mspC3</i> )-KanR(427)  | pP <sub>natp</sub> - <i>lepA</i> -HygR(417)                  |
| SF443         | $\Delta lepA::ZeoR$ (HR334)           | pP <sub>UV15-Tet</sub> - <i>dCas9</i> -sgRNA10 ( <i>mspD1</i> )-KanR(428) | pP <sub>natp</sub> - <i>lepA</i> -HygR(417)                  |
| SF444         | $\Delta lepA::ZeoR$ (HR334)           | pP <sub>UV15-Tet</sub> - <i>dCas9</i> -sgRNA11 ( <i>mspD2</i> )-KanR(429) | pP <sub>natp</sub> - <i>lepA</i> -HygR(417)                  |
| SF445         | $\Delta lepA::ZeoR$ (HR334)           | pP <sub>UV15-Tet</sub> - <i>dCas9</i> -sgRNA12 ( <i>mspD3</i> )-KanR(430) | pP <sub>natp</sub> - <i>lepA</i> -HygR(417)                  |
| SF388         | $\Delta lepA::ZeoR$ (HR334)           | pP <sub>natp</sub> - <i>lepA</i> -KanR(SF121)                             | pP <sub>UV15</sub> - <i>mspB</i> (MSMEG_0520)-Nluc-NatR(384) |
| SF389         | $\Delta lepA::ZeoR$ (HR334)           | p-empty-KanR(CT242)                                                       | pP <sub>UV15</sub> - <i>mspB</i> (MSMEG_0520)-Nluc-NatR(384) |
| SF390         | $\Delta lepA::ZeoR$ (HR334)           | pP <sub>natp</sub> - <i>lepA</i> -KanR(121)                               | pP <sub>UV15</sub> - <i>mspC</i> (MSMEG_5483)-Nluc-NatR(383) |
| SF391         | $\Delta lepA::ZeoR$ (HR334)           | p-empty-KanR(CT242)                                                       | pP <sub>UV15</sub> - <i>mspC</i> (MSMEG_5483)-Nluc-NatR(383) |
| SF392         | $\Delta lepA::ZeoR$ (HR334)           | pP <sub>natp</sub> - <i>lepA</i> -KanR(121)                               | pP <sub>UV15</sub> - <i>mspD</i> (MSMEG_6057)-Nluc-NatR(385) |
| SF393         | $\Delta lepA::ZeoR$ (HR334)           | p-empty-KanR(CT242)                                                       | pP <sub>UV15</sub> - <i>mspD</i> (MSMEG_6057)-Nluc-NatR(385) |
| SF902         | $\Delta lepA::ZeoR$ (HR334)           | pP <sub>natp</sub> - <i>lepA</i> -KanR(121)                               | pP <sub>UV15</sub> - <i>mspA</i> -mRFP-NatR(896)             |
| SF903         | $\Delta lepA::ZeoR$ (HR334)           | p-empty-KanR(CT242)                                                       | pP <sub>UV15</sub> - <i>mspA</i> -mRFP-NatR(896)             |
| SF789         | $\Delta lepA::ZeoR/\Delta mspA::HygR$ | None                                                                      | None                                                         |
| HR329         | $\Delta mspA::ZeoR$                   | None                                                                      | None                                                         |
| SF447         | $\Delta lepA::ZeoR$ (HR334)           | pP <sub>UV15-Tet</sub> - <i>dCas9</i> -sgRNA1 ( <i>mspA1</i> )-KanR(419)  | p-empty-HygR(418)                                            |

|                           |                                                                                 |                                                                     |                                                                           |
|---------------------------|---------------------------------------------------------------------------------|---------------------------------------------------------------------|---------------------------------------------------------------------------|
| <b>SF448</b>              | $\Delta lepA::ZeoR$ (HR334)                                                     | pP <sub>UV15-Tet</sub> -dCas9-sgRNA2<br>( <i>m</i> spA2)-KanR(420)  | p-empty-HygR(418)                                                         |
| <b>SF449</b>              | $\Delta lepA::ZeoR$ (HR334)                                                     | pP <sub>UV15-Tet</sub> -dCas9-sgRNA3<br>( <i>m</i> spA3)-KanR(421)  | p-empty-HygR(418)                                                         |
| <b>SF450</b>              | $\Delta lepA::ZeoR$ (HR334)                                                     | pP <sub>UV15-Tet</sub> -dCas9-sgRNA4<br>( <i>m</i> spB1)-KanR(422)  | p-empty-HygR(418)                                                         |
| <b>SF451</b>              | $\Delta lepA::ZeoR$ (HR334)                                                     | pP <sub>UV15-Tet</sub> -dCas9-<br>sgRNA5( <i>m</i> spB2)-KanR(423)  | p-empty-HygR(418)                                                         |
| <b>SF452</b>              | $\Delta lepA::ZeoR$ (HR334)                                                     | pP <sub>UV15-Tet</sub> -dCas9-sgRNA6<br>( <i>m</i> spB3)-KanR(424)  | p-empty-HygR(418)                                                         |
| <b>SF453</b>              | $\Delta lepA::ZeoR$ (HR334)                                                     | pP <sub>UV15-Tet</sub> -dCas9-sgRNA7<br>( <i>m</i> spC1)-KanR(425)  | p-empty-HygR(418)                                                         |
| <b>SF454</b>              | $\Delta lepA::ZeoR$ (HR334)                                                     | pP <sub>UV15-Tet</sub> -dCas9-sgRNA8<br>( <i>m</i> spC2)-KanR(426)  | p-empty-HygR(418)                                                         |
| <b>SF455</b>              | $\Delta lepA::ZeoR$ (HR334)                                                     | pP <sub>UV15-Tet</sub> -dCas9-sgRNA9<br>( <i>m</i> spC3)-KanR(427)  | p-empty-HygR(418)                                                         |
| <b>SF456</b>              | $\Delta lepA::ZeoR$ (HR334)                                                     | pP <sub>UV15-Tet</sub> -dCas9-sgRNA10<br>( <i>m</i> spD1)-KanR(428) | p-empty-HygR(418)                                                         |
| <b>SF457</b>              | $\Delta lepA::ZeoR$ (HR334)                                                     | pP <sub>UV15-Tet</sub> -dCas9-sgRNA11<br>( <i>m</i> spD2)-KanR(429) | p-empty-HygR(418)                                                         |
| <b>SF458</b>              | $\Delta lepA::ZeoR$ (HR334)                                                     | pP <sub>UV15-Tet</sub> -dCas9-sgRNA12<br>( <i>m</i> spD3)-KanR(430) | p-empty-HygR(418)                                                         |
| <b>SF502</b>              | $\Delta lepA::ZeoR$ (HR334)                                                     | pP <sub>UV15-Tet</sub> -dCas9-sgRNA null-<br>KanR(CT295)            | p-natp- <i>lepA</i> -HygR(417)                                            |
| <b>SF503</b>              | $\Delta lepA::ZeoR$ (HR334)                                                     | pP <sub>UV15-Tet</sub> -dCas9-sgRNA null-<br>KanR(CT295)            | p-empty-HygR(418)                                                         |
| <b>SF504</b>              | $\Delta lepA::ZeoR$ (HR334)                                                     | pP <sub>UV15-Tet</sub> -dCas9-sgRNA1-<br>sgRNA6-sgRNA7-KanR(484)    | p-natp- <i>lepA</i> -HygR(417)                                            |
| <b>SF505</b>              | $\Delta lepA::ZeoR$ (HR334)                                                     | pP <sub>UV15-Tet</sub> -dCas9-sgRNA1-<br>sgRNA6-sgRNA7-KanR(484)    | p-empty-HygR(418)                                                         |
| <b>SF740</b>              | BL21 <i>E. coli</i> /pET26-P <sub>T7</sub> -6xHisTag-<br><i>lepA</i> -KanR      | None                                                                | None                                                                      |
| <b>SF1037</b>             | $\Delta lepA::ZeoR$ (HR334)                                                     | pNatp- <i>lepA</i> H109A-<br>KanR(1036)                             | none                                                                      |
| <b>SF1038</b>             | $\Delta lepA::ZeoR$ (HR334)                                                     | pNatp- <i>lepA</i> H109A-<br>KanR(1036)                             | pP <sub>UV15-Tet</sub> - <i>m</i> spA-Nluc-<br>NatR(283)                  |
| <b>SF1039</b>             | $\Delta lepA::ZeoR$ (HR334)                                                     | pNatp- <i>lepA</i> H109A-<br>KanR(1036)                             | pP <sub>UV15-Tet</sub> -<br><i>m</i> spB(MSMEG_0520)-Nluc-<br>NatR(384)   |
| <b>SF1040</b>             | $\Delta lepA::ZeoR$ (HR334)                                                     | pNatp- <i>lepA</i> H109A-<br>KanR(1036)                             | pP <sub>UV15-Tet</sub> -<br><i>m</i> spC(MSMEG_5483)-Nluc-<br>NatR(383)   |
| <b>SF1041</b>             | $\Delta lepA::ZeoR$ (HR334)                                                     | pNatp- <i>lepA</i> H109A-<br>KanR(1036)                             | pP <sub>UV15-Tet</sub> - <i>m</i> spA recode (AT-<br>rich)-Nluc-NatR(555) |
| <b>SF1042</b>             | $\Delta lepA::ZeoR$ (HR334)                                                     | pNatp- <i>lepA</i> H109A-<br>KanR(1036)                             | pP <sub>UV15-Tet</sub> - <i>m</i> spA recode (AT-<br>rich)-Nluc-NatR(555) |
| <b>SF583</b>              | $\Delta lepA::ZeoR$ (HR334)                                                     | pNatp- <i>lepA</i> H109A-<br>KanR(1036)                             | pP <sub>UV15-Tet</sub> - <i>m</i> spA recode (AT-<br>rich)-Nluc-NatR(555) |
| <b>WT</b>                 | mc <sup>2</sup> 155                                                             | None                                                                | None                                                                      |
| <b>MmpL3-<br/>Dendra*</b> | WT                                                                              | pP <sub>myc1-tetO</sub> -MSMEG_0250-<br>Dendra-ApR                  | None                                                                      |
| <b>GroEL-<br/>Dendra*</b> | WT                                                                              | pP <sub>myc1-tetO</sub> -MSMEG_0880-<br>Dendra-ApR                  | None                                                                      |
| <b>FT150</b>              | BL21 <i>E. coli</i> /pET26-P <sub>T7</sub> -6xHisTag-<br><i>lepA</i> H109A-KanR | None                                                                | None                                                                      |

\*These strains were a kind gift from the Mycobacterial Systems Resource (PI, K. Derbyshire)



**Table S3: Plasmid List**

| Number | Contents                                                                | Selection | Parental Vector               | Notes                                                                 |
|--------|-------------------------------------------------------------------------|-----------|-------------------------------|-----------------------------------------------------------------------|
| 121    | pP <sub>natp</sub> - <i>lepA</i> -KanR                                  | Kan       | CT94                          |                                                                       |
| 283    | pP <sub>rpsA</sub> - <i>mspA</i> (MSMEG_0965)-Nanoluciferase(Nluc)-NatR | Nat       | CT250                         |                                                                       |
| 287    | pP <sub>rpsA</sub> -Nluc-NatR                                           | Nat       | CT250                         |                                                                       |
| 383    | pP <sub>rpsA</sub> - <i>mspC</i> (MSMEG_5483)-Nluc-NatR                 | Nat       | CT250                         |                                                                       |
| 384    | pP <sub>rpsA</sub> - <i>mspB</i> (MSMEG_0520)-Nluc-NatR                 | Nat       | CT250                         |                                                                       |
| 385    | pP <sub>rpsA</sub> - <i>mspD</i> (MSMEG_6057)-Nluc-NatR                 | Nat       | CT250                         |                                                                       |
| 417    | pP <sub>natp</sub> - <i>lepA</i> -HygR                                  | Hyg       | CT204                         |                                                                       |
| 418    | p-empty-HygR                                                            | Hyg       | CT204                         |                                                                       |
| 419    | pP <sub>rpsA</sub> -Tet-dCas9-sgRNA1 ( <i>mspA1</i> )-KanR              | Kan       | CT295                         |                                                                       |
| 420    | pP <sub>rpsA</sub> -Tet-dCas9-sgRNA2 ( <i>mspA2</i> )-KanR              | Kan       | CT295                         |                                                                       |
| 421    | pP <sub>rpsA</sub> -Tet-dCas9-sgRNA3 ( <i>mspA3</i> )-KanR              | Kan       | CT295                         |                                                                       |
| 422    | pP <sub>rpsA</sub> -Tet-dCas9-sgRNA4 ( <i>mspB1</i> )-KanR              | Kan       | CT295                         |                                                                       |
| 423    | pP <sub>rpsA</sub> -Tet-dCas9-sgRNA5( <i>mspB2</i> )-KanR               | Kan       | CT295                         |                                                                       |
| 424    | pP <sub>rpsA</sub> -Tet-dCas9-sgRNA6 ( <i>mspB3</i> )-KanR              | Kan       | CT295                         |                                                                       |
| 425    | pP <sub>rpsA</sub> -Tet-dCas9-sgRNA7 ( <i>mspC1</i> )-KanR              | Kan       | CT295                         |                                                                       |
| 426    | pP <sub>rpsA</sub> -Tet-dCas9-sgRNA8 ( <i>mspC2</i> )-KanR              | Kan       | CT295                         |                                                                       |
| 427    | pP <sub>rpsA</sub> -Tet-dCas9-sgRNA9 ( <i>mspC3</i> )-KanR              | Kan       | CT295                         |                                                                       |
| 428    | pP <sub>rpsA</sub> -Tet-dCas9-sgRNA10 ( <i>mspD1</i> )-KanR             | Kan       | CT295                         |                                                                       |
| 429    | pP <sub>rpsA</sub> -Tet-dCas9-sgRNA11 ( <i>mspD2</i> )-KanR             | Kan       | CT295                         |                                                                       |
| 430    | pP <sub>rpsA</sub> -Tet-dCas9-sgRNA12 ( <i>mspD3</i> )-KanR             | Kan       | CT295                         |                                                                       |
| 711    | pET26-P <sub>T7</sub> -6xHisTag- <i>lepA</i> -KanR                      | Kan       | pET26                         |                                                                       |
| 741    | pET21-P <sub>T7</sub> -Venus-AmpR                                       | Amp       | pET21                         |                                                                       |
| 896    | pP <sub>rpsA</sub> - <i>mspA</i> -mRFP-NatR                             | Nat       | CT250                         |                                                                       |
| CT204  | pP <sub>TB21</sub> -eGFP- <i>wag31</i> -HygR                            | Hyg       | Lab vector                    | Backbone of cloning vector for Tweety-integrating <i>lepA</i> alleles |
| CT242  | p-empty-KanR                                                            | Kan       | CT94                          |                                                                       |
| CT250  | pP <sub>rpsA</sub> -eGFP-NatR                                           | Nat       | Lab vector                    | Backbone of cloning vector for Tweety-integrating porin alleles       |
| CT295  | pP <sub>rpsA</sub> -Tet-dCas9-sgRNA null-KanR                           | Kan       | Courteous gift of Jeremy Rock |                                                                       |
| CT94   | pP <sub>rpsA</sub> -Tet-eGFP-KanR                                       | Kan       | Lab vector                    | Backbone of cloning vector for L5-integrating <i>lepA</i> alleles     |

|              |                                                         |     |            |                                                                   |
|--------------|---------------------------------------------------------|-----|------------|-------------------------------------------------------------------|
| <b>1036</b>  | pP <sub>natp</sub> - <i>lepAH109A</i> -KanR             | Kan | Lab vector | Backbone of cloning vector for L5-integrating <i>lepA</i> alleles |
| <b>FT150</b> | pET26-P <sub>T7</sub> -6xHisTag- <i>lepAH109A</i> -KanR | Kan | Lab vector |                                                                   |

**Table S4: Primer List**

| Number | Name                  | Sequence                                                                        | Purpose (vector number or description) |
|--------|-----------------------|---------------------------------------------------------------------------------|----------------------------------------|
| P315   | CT133_nat_prom_4556_F | TTTGC GTTTAATACTGCATGCACTg<br>aatcgagcatatgccagcgg                              | 121                                    |
| P422   | 4556_R_redo           | CTAGGGTCCCAATTAATTAGCTA<br>Atcacttctggctgtgcgcc                                 | 121                                    |
| P626   | UV15-mspA_F           | cttaattaagaaggagatatacatatgaaggcaat<br>cagtcgggtgctg                            | 283;896                                |
| P627   | mspA-Nluc_R           | ggctcacgtctgtTCCAGAACCgttcatgtcc<br>agggttcgccg                                 | 283;944                                |
| P628   | mspA-Nluc_F           | aaccctggaacatgaacGTTTCTGGAaca<br>gacgtgagccgaaagattcg                           | 283                                    |
| P629   | Nluc-Ct250-R          | GGGTCCCAATTAATTAGCTAATC<br>ACAGGTCTTCCTCGCTGATCAGCT<br>TCTGCTCggcgaggatgcgctcgc | 283;287;383;384;385                    |
| P632   | UV15-Nluc_F           | gcttaattaagaaggagatatacatatgacagac<br>gtgagccgaaagattcg                         | 287                                    |
| P844   | Nluc-F                | gtcttcaccctggaggacttcgctg                                                       | 383;384;385                            |
| P772   | UV15_MspC_F           | cttaattaagaaggagatatacatatgaaggcaat<br>cagtcgggtgctg                            | 384                                    |
| P773   | MspC_Nluc_R           | cctccagggtgaagacTCCAGAACCgttcat<br>gttccagggttcgccg                             | 384                                    |
| P774   | UV15_MspB_F           | ttaattaagaaggagatatacatatgacggcattc<br>aagcgggtgct                              | 383                                    |
| P775   | MspB_Nluc_R           | cctccagggtgaagacTCCAGAACCgttcat<br>attccaaggctcgccgta                           | 383                                    |
| P776   | UV15_MspD_F           | ttaattaagaaggagatatacatatgtgcgctacctc<br>gtcatgatg                              | 385                                    |
| P777   | MspD_Nluc_R           | tccagggtgaagacTCCAGAACCgttcatgt<br>tccagggttcgcc                                | 385                                    |
| P842   | CT204_lepA_F          | actgtttaaactctagaaatattatgcgggtgcgtt<br>gttcgc                                  | 417                                    |
| P843   | CT204_lepA_R          | tcgctgccaccaatccccatagTCGTACGC<br>TAGTTAACTACGTCGACA                            | 417                                    |
| P807   | mspA_R                | AAACAATGGTGTGTTCCCCCTGGA<br><u>C</u>                                            | 419 (Figure 3a, Supp. Figure 2d #1)    |
| P808   | mspA_F                | GGGAGTCCAGGGGGAACACACCA<br><u>TT</u>                                            | 419 (Figure 3a, Supp. Figure 2d #1)    |
| P826   | MspA_R2               | AAACGTCGACGTCTCCGGCGCCG<br><u>AGGGT</u>                                         | 420(Supp. Figure 2d #2)                |
| P827   | MspA_F2               | GGGAACCCTCGGCGCCGAGACG<br><u>TCGAC</u>                                          | 420(Supp. Figure 2d #2)                |
| P828   | MspA_R3               | AAACCTGGACCGCAACCGTCTTAC<br><u>CCGT</u>                                         | 421(Supp. Figure 2d #3)                |
| P829   | MspA_F3               | GGGAACGGGTAAGACGGTTGCGG<br><u>TCCAG</u>                                         | 421(Supp. Figure 2d #3)                |
| P811   | mspB_R                | AAACTGGTCGCTGGGTGTGGGCA<br><u>TC</u>                                            | 422(Supp. Figure 2d #1)                |
| P812   | mpsB_F                | GGGAGATGCCACACCCAGCGAC<br><u>CA</u>                                             | 422(Supp. Figure 2d #1)                |

|              |               |                                                             |                                    |
|--------------|---------------|-------------------------------------------------------------|------------------------------------|
| <b>P830</b>  | MspB_R2       | <u>AAACGTCGACGTCTCGGGTCCTG</u><br><u>C</u>                  | 423(Supp. Figure 2d #2)            |
| <b>P831</b>  | MspB_F2       | <u>GGGAGCAGGACCCGAGACGTCGA</u><br><u>C</u>                  | 423(Supp. Figure 2d #2)            |
| <b>P832</b>  | MspB_R3       | <u>AAACGTTGCTCGCAGGCACCACG</u><br><u>GGAAT</u>              | 424(Figure 3a, Supp. Figure 2d #3) |
| <b>P833</b>  | MspB_F3       | <u>GGGAATTCCCGTGGTGCCTGCGA</u><br><u>GCAAC</u>              | 424(Figure 3a, Supp. Figure 2d #3) |
| <b>P813</b>  | mspC_R        | <u>AAACGTTGGCTGCGGCCGTCGCG</u><br><u>GGGT</u>               | 425(Figure 3a, Supp. Figure 2d #1) |
| <b>P814</b>  | mspC_F        | <u>GGGAACCCCGCGACGGCCGCGAG</u><br><u>CCAAC</u>              | 425(Figure 3a, Supp. Figure 2d #1) |
| <b>P834</b>  | MspC_R2       | <u>AAACGTCGACGTCTCGGGTCCCG</u><br><u>CAGGC</u>              | 426(Supp. Figure 2d #2)            |
| <b>P835</b>  | MspC_F2       | <u>GGGAGCCTGCGGGACCCGAGAC</u><br><u>GTCGAC</u>              | 426(Supp. Figure 2d #2)            |
| <b>P836</b>  | MspC_R3       | <u>AAACTCGACGACGGTGACATCACC</u><br><u>GGT</u>               | 427(Supp. Figure 2d #3)            |
| <b>P837</b>  | MspC_F3       | <u>GGGAACCGGTGATGTCACCGTCG</u><br><u>TCGA</u>               | 427(Supp. Figure 2d #3)            |
| <b>P809</b>  | mspD_R        | <u>AAACTGGTCATTGGGCGTCGGCAT</u><br><u>C</u>                 | 428(Supp. Figure 2d #1)            |
| <b>P810</b>  | mspD_F        | <u>GGGAGATGCCGACGCCCAATGAC</u><br><u>CA</u>                 | 428(Supp. Figure 2d #1)            |
| <b>P838</b>  | MspD_R2       | <u>AAACGTGGACGTGAAGGGCGCGA</u><br><u>AAGGAGC</u>            | 429(Supp. Figure 2d #2)            |
| <b>P839</b>  | MspD_F2       | <u>GGGAGCTCCTTTCGCGCCCTTCA</u><br><u>CGTCCAC</u>            | 429(Supp. Figure 2d #2)            |
| <b>P840</b>  | MspD_R3       | <u>AAACTCGACGGAGGCGACATCAC</u><br><u>C</u>                  | 430(Supp. Figure 2d #3)            |
| <b>P841</b>  | MspD_F3       | <u>GGGAGGTGATGTCGCCTCCGTCG</u><br><u>A</u>                  | 430(Supp. Figure 2d #3)            |
| <b>P1139</b> | MspA_mRFP_R   | CTTGATGACGTCCTCGGAGGAGG<br>CGTTCATGTTCCAGGGTTCGCCGT         | 896                                |
| <b>P1144</b> | mRFP_CT250_R  | GGTCCCCAATTAATTAGCTAAAGC<br>TTCAGCGGCCCTCGGCGCGCTCG<br>TACT | 896                                |
| <b>P1143</b> | mRFP_F        | GCCTCCTCCGAGGACGTCATCAA                                     | 896                                |
| <b>P1042</b> | pET26_venus_F | actttaagaaggagatatacatATGGTCTCG<br>AAGGGCGAGGAGCTG          | 741                                |
| <b>P1043</b> | pET26_venus_R | gtggtggtggtggtgctcgatcaGTGATGGT<br>GATGGTGTGACACTTGTACAGC   | 741                                |
| P845         | mspA_F1_RT    | CAGATGTGATCCTCTTAGATCTCC                                    | RT-qPCR of porins                  |
| P846         | mspA_R1_RT    | CTCAGGCCACCTGTTT                                            | RT-qPCR of porins                  |
| P847         | mspA_F2_RT    | TAGATCTCCGAAGTCTCTGAA                                       | RT-qPCR of porins                  |
| P848         | mspA_R2_RT    | GTTCTCCCTAACTGTATCGC                                        | RT-qPCR of porins                  |
| P849         | mspB_F1_RT    | ATCAAGCGGGTGCTGAT                                           | RT-qPCR of porins                  |
| P850         | mspB_R1_RT    | ACGAGGCTCAATTCGTTGT                                         | RT-qPCR of porins                  |
| P851         | mspB_F2_RT    | ACGGGAATGTTGCGTGAGTG                                        | RT-qPCR of porins                  |

|       |                   |                                                                                |                      |
|-------|-------------------|--------------------------------------------------------------------------------|----------------------|
| P852  | mspB_R2_RT        | GCTGCACGGTCAGAGTT                                                              | RT-qPCR of porins    |
| P853  | mspC_F1_RT        | GAACGTAAGAACAGAGTGTGGAG                                                        | RT-qPCR of porins    |
| P854  | mspC_R1_RT        | CACCGATGTTGTGGTGTAGG                                                           | RT-qPCR of porins    |
| P855  | mspC_F2_RT        | TTTAATTCGCGCCACATGAC                                                           | RT-qPCR of porins    |
| P856  | mspC_R2_RT        | GGGTCCACCGATGTTGT                                                              | RT-qPCR of porins    |
| P857  | mspD_F1_RT        | CGTCATGATGTTTCGCTCTACTC                                                        | RT-qPCR of porins    |
| P858  | mspD_R1_RT        | TTGAGGAATGTCTCGGCTTG                                                           | RT-qPCR of porins    |
| P859  | mspD_F2_RT        | CGCTACCTCGTCATGATGTT                                                           | RT-qPCR of porins    |
| P860  | mspD_R2_RT        | AATCAGCTCAGCGTGGTC                                                             | RT-qPCR of porins    |
| SF37  | RTPCR_sigA_F      | gactacaccaagggctacaag                                                          | RT-qPCR of porins    |
| SF38  | RTPCR_sigA_R      | ttgatcacctcgaccatgtg                                                           | RT-qPCR of porins    |
| P1017 | pET28_LepA_myco_R | agtggtggtggtggtggtgctcgactactcttggg<br>ctgtcgcccgc                             | 711                  |
| P1018 | pET28_LepA_myco_F | ttaactttaagaaggagatataccatgggcagca<br>gccatcatcatcatcaccgctgaccacgct<br>caccag | 711                  |
| P1018 | pET28_LepA_myco_F | ttaactttaagaaggagatataccatgggcagca<br>gccatcatcatcatcaccgctgaccacgct<br>caccag | 711                  |
| P1236 | lepA_H109A_F      | GTGCTGCACCTGATCGACACCCC<br>GGGCGCCGTCGACTTCACCTACG<br>AGGTGTCGC                | GTPase mutant (1036) |
| P1237 | lepA_H109A_R      | GCGACACCTCGTAGGTGAAGTCG<br>ACGGCGCCCGGGGTGTCGATCAG<br>GTGCAGCAC                | GTPase mutant (1036) |

Note: underlined basepairs indicate sequence-specific region of sgRNA

**Table S5: Recombinant DNA**

|                                                                                                                                                                                                                                                                                                                                                                                                                                                                                                                                                                                                                                                                                                                       |
|-----------------------------------------------------------------------------------------------------------------------------------------------------------------------------------------------------------------------------------------------------------------------------------------------------------------------------------------------------------------------------------------------------------------------------------------------------------------------------------------------------------------------------------------------------------------------------------------------------------------------------------------------------------------------------------------------------------------------|
| <i>mRFP gene</i>                                                                                                                                                                                                                                                                                                                                                                                                                                                                                                                                                                                                                                                                                                      |
| GCCTCCTCCGAGGACGTCATCAAGGAGTTCATGCGCTTCAAGGTGCGCATGGAGGGCTCCGTGAACGGCCA<br>CGAGTTTCGAGATCGAGGGCGAGGGCGAGGGCCGCCCTACGAGGGCACCCAGACCGCCAAGCTGAAGGTG<br>ACCAAGGGCGGCCCCCTGCCCTTCGCCTGGGACATCCTGTCCCCTCAGTTCCAGTACGGCTCCAAGGCCTA<br>CGTGAAGCACCCCGCCGACATCCCCGACTACTTGAAGCTGTCCCTCCCCGAGGGCTTCAAGTGGGAGCGCG<br>TGATGAACTTCGAGGACGGCGGCGTGGTGACCGTGACCCAGGACTCCTCCCTGCAGGACGGCGAGTTCATC<br>TACAAGGTGAAGCTGCGCGGCACCAACTTCCCCTCCGACGGCCCCGTAATGCAGAAGAAGACCATGGGCTG<br>GGAGGCCTCCACCGAGCGGATGTACCCCGAGGACGGCGCCCTGAAGGGCGAGATCAAGATGAGGCTGAAG<br>CTGAAGGACGGCGGCCACTACGACGCCGAGGTCAAGACCACCTACATGGCCAAGAAGCCCGTGCAGCTGCC<br>CGGCGCCTACAAGACCGACATCAAGCTGGACATCACCTCCCACAACGAGGACTACACCATCGTGGAACAGTA<br>CGAGCGCGCCGAGGGCCGC |
| Nanoluciferase gene                                                                                                                                                                                                                                                                                                                                                                                                                                                                                                                                                                                                                                                                                                   |
| ATGGTCTTCACCCTGGAGGACTTCGTGCGGCGACTGGCGTCAGACCCGAGGCTACAACCTGGACCAGGTGCT<br>GGAACAGGGGGGCGTGTCTCGCTCTTCCAGAACCTCGGCGTGTCCGTGACCCCGATCCAGCGGATCGTCT<br>TGTCGGGCGAAAACGGACTGAAGATCGACATCCACGTCATCATCCCATACGAAGGCCTGAGCGGTGACCAGA<br>TGGGCCAGATCGAAAAGATCTTCAAGGTCGTCTACCCCGTTGATGACCACCACTTCAAGGTGATCCTGCACTA<br>CGGTACTCTGGTCATCGACGGCGTCACCCCAAACATGATCGACTACTTCGGGCGTCCTTACGAAGGCATCGC<br>CGTGTTTCGACGGCAAGAAAATCACCGTCACCGGCACGTTGTGGAACGGCAACAAGATCATCGACGAGCGCC<br>TCATCAACCCCGACGGATCGCTGCTGTTCCGGGTACCATCAACGGCGTCACCGGTTGGCGTTGTGCGAG<br>CGCATCCTCGCCTGA                                                                                                                                                       |

**Additional dataset S1 (separate file)**

Quantitative proteomics of wildtype, *lepA* deletion mutant, and complemented strain

**Additional dataset S2 (separate file)**

RNA-sequencing data for wildtype, *lepA* deletion mutant, and complemented strain

**Supplementary Material References**

1. Huang da W, Sherman BT, Lempicki RA. 2009. Systematic and integrative analysis of large gene lists using DAVID bioinformatics resources. *Nat Protoc* 4:44-57.
2. Rock JM, Hopkins FF, Chavez A, Diallo M, Chase MR, Gerrick ER, Pritchard JR, Church GM, Rubin EJ, Sassetti CM, Schnappinger D, Fortune SM. 2017. Programmable transcriptional repression in mycobacteria using an orthogonal CRISPR interference platform. *Nat Microbiol* 2:16274.
